# Supplementary material
Source: PubMed Central journal article supplement (PMC4301164)
Supplement: JVI.02704-14_zjv999099898so6.pdf [file JVI.02704-14_zjv999099898so6.pdf]

Table S1. Viruses used in the present study

| Virus                                                     | Genetic group        | Strain         | Isolation year | Location          | Source                 |
|-----------------------------------------------------------|----------------------|----------------|----------------|-------------------|------------------------|
| Severe Fever with Thrombocytopenia Syndrome virus (SFTSV) | SFTS/Heartland group | HB29           | 2010           | China             | China CDC <sup>1</sup> |
|                                                           |                      | SD4            | 2010           | China             | China CDC              |
| Heartland virus                                           | SFTS/Heartland group | Mo4            | 2009           | Missouli, USA     | UTMB <sup>2</sup>      |
| Bhanja virus                                              | Bhanja group         | IG690          | 1954           | India             | UTMB                   |
|                                                           |                      | IbAr2709       | 1968           | Nigeria           | UTMB                   |
| Palma virus                                               | Bhanja group         | R-1819         | 1974           | Yugoslavia        | CDC <sup>3</sup>       |
| Forecariah virus                                          | Bhanja group         | PoTi4.92       | 1992           | Portugal          | UTMB                   |
| Kismayo virus                                             | Bhanja group         | DakArk4927     | 1883           | Guinea            | CDC                    |
| Lone Star virus                                           | Bhanja group         | LEIV3641A      | 1974           | Somalia           | UTMB                   |
| Uukuniemi virus                                           | Uukuniemi group      | TMA 1381       | 1967           | Kentucky, USA     | UTMB                   |
|                                                           |                      | S23            | 1960           | Finaland          | UTMB                   |
| EgAN 1825-61 virus                                        | Uukuniemi group      | SCOT FT 254    | 1974           | Scotland          | UTMB                   |
| Manawa virus                                              | Uukuniemi group      | Potepli 63     | 1963           | Czech             | UTMB                   |
| Grand Arbaud virus                                        | Uukuniemi group      | EgAn 1825-61   | 1961           | Egypt             | UTMB                   |
| Sunday Canyon virus                                       | Uukuniemi group      | Argas T-461    | 1964           | Pakistan          | UTMB                   |
| Zaliv Terpeniya virus                                     | Uukuniemi group      | Argas 2        | 1966           | France            | UTMB                   |
| Murre virus                                               | Uukuniemi group      | RML 52301-11   | 1969           | Texas, USA        | UTMB                   |
| FinV707 virus                                             | Uukuniemi group      | LEIV-271Ka     | 1970           | Kamchatka, Russia | UTMB                   |
| Precarious Point virus                                    | Uukuniemi group      | Murre H        | 1973           | Alaska, USA       | UTMB                   |
| RML-105355 virus                                          | Uukuniemi group      | FinV707        | 1975           | Norway            | UTMB                   |
| Chizé virus                                               | Uukuniemi group      | MI 19334       | 1975           | Australia         | UTMB                   |
| Kaisodi virus                                             | Uukuniemi group      | RML-105355     | 1977           | Alaska, USA       | UTMB                   |
| Lanjan virus                                              | Uukuniemi group      | Brest Ar/T2913 | 1993           | France            | UTMB                   |
| Silverwater virus                                         | Kaisodi group        | IG14132        | 1957           | India             | UTMB, CDC              |
|                                                           | Kaisodi group        | Mal TP94       | 1960           | Malaysia          | UTMB                   |
|                                                           | Kaisodi group        | Can131         | 1960           | Canada            | UTMB                   |

1 Key Laboratory of Medical Virology, National Institute for Viral Disease Control and Prevention, China CDC

2 World Reference Center for Emerging Viruses and Arboviruses (WRCEVA), University of Texas Medical Branch (UTMB)

3 Division of Vector-Borne Diseases (DVBD), arbovirus reference collection, Centers for Disease Control and Prevention (CDC)

Table S2. GeneBank sequences used in the full-length phylogeny

| Genetic group                                | Virus                             | Accession number     |               |           |
|----------------------------------------------|-----------------------------------|----------------------|---------------|-----------|
|                                              |                                   | L segment            | M segment     | S segment |
| Bhanja group                                 | Bhanja virus IG690                | JX961619             | JX961620      | JX961621  |
|                                              | Bhanja virus R-1819               | JX961622             | JX961623      | JX961624  |
|                                              | Bhanja virus IbAr2709             | JX961616             | JX961617      | JX961618  |
|                                              | Forecariah virus DakArk4927       | JX961625             | JX961626      | JX961627  |
|                                              | Palma virus PoTi4.92              | JX961628             | JX961629      | JX961630  |
|                                              | Bhanja virus M3811                | JQ956376             | JQ956377      | JQ956378  |
|                                              | Palma virus M3443                 | JQ956379             | JQ956380      | JQ956381  |
|                                              | Razdan virus LEIV-Arm2741         | KC335496             | KC335497      | KC335498  |
|                                              | Lone Star virus TMA 1381          | KC589005             | KC589006      | KC589007  |
|                                              | SFTS/Heratland group              | SFTSV 2010-WSQ       | HQ419226      | HQ419235  |
| SFTSV AHZ/China/2011                         |                                   | JQ670929             | JQ670931      | JQ670933  |
| SFTSV BX-2010/Henan/CHN                      |                                   | HQ642766             | HQ642767      | HQ642768  |
| SFTSV HB29/China/2010                        |                                   | HM745930             | HM745931      | HM745932  |
| SFTSV JS4/China/2010                         |                                   | HQ141604             | HQ141605      | HQ141606  |
| SFTSV SD4/China/2010                         |                                   | HM802202             | HM802203      | HM802204  |
| SFTSV SDLZtick12/2010                        |                                   | JQ684871             | JQ684872      | JQ684873  |
| SFTSV XCQ-A112M                              |                                   | JF906056             | JF906057      | JF906058  |
| SFTSV YG1                                    |                                   | AB817979             | AB817987      | AB817995  |
| SFTSV Gangwon/Korea/2012                     |                                   | KF358691             | KF358692      | KF358693  |
| Heartland virus Patient 1                    |                                   | JX005846             | JX005844      | JX005842  |
| Heartland virus Patient 2                    |                                   | JX005847             | JX005845      | JX005843  |
| Maloor virus NIV1050650                      |                                   | KF186497             | KF186498      | KF186499  |
| Maloor virus NIV1050639                      |                                   | KF186494             | KF186495      | KF186496  |
| Hunter Island virus                          |                                   | KF848980             | KF848981      | KF848982  |
| Uukuniemi group                              | Uukuniemi virus S23               | D10759               | M17417        | M33551    |
|                                              | Zaliv Terpenia virus              | HM566191             | HM566193      | HM566192  |
|                                              | Precarious point virus            | HM566181             | HM566179      | HM566180  |
|                                              | EgAN 1825-61 virus                | HM566159             | HM566158      | HM566160  |
|                                              | Chize virus strain Brest Ar/T2913 | JF838324             | JF838325      | JF838326  |
|                                              | Grand Arbaud virus Argas 27       | JF838327             | JF838328      | JF838329  |
|                                              | Murre virus strain Murre H        | JF838330             | JF838331      | JF838332  |
|                                              | RML-105355 virus                  | JF838333             | JF838334      | JF838335  |
|                                              | FinV707 virus                     | JQ924562             | JQ924563      | JQ924564  |
|                                              | Manawa virus PakT 462             | JQ924565             | JQ924566      | JQ924567  |
|                                              | Zaliv Terpenia virus LEIV-279Az   | KF767460             | KF767461      | KF767462  |
|                                              | Zaliv Terpenia virus LEIV-13841Ka | KF767463             | KF767464      | KF767465  |
|                                              | Others                            | Karimabad virus I-58 | KF297912      | KF297913  |
| Rift Valley fever virus ZH-548               |                                   | DQ375403             | DQ380206      | DQ380151  |
| Rift Valley fever virus 200803162            |                                   | JF311368             | JF311377      | JF311386  |
| Rift Valley fever virus TAN/Tan-001/07       |                                   | HM586959             | HM586970      | HM586981  |
| Munguba virus                                |                                   | HM566164             | HM566165      | HM566166  |
| Alenquer virus                               |                                   | HM119401             | HM119402      | HM119403  |
| Ariquemes virus                              |                                   | HM119404             | HM119405      | HM119406  |
| Candiru virus                                |                                   | HM119407             | HM119408      | HM119409  |
| Aguacate virus VP-175A-Aguacate              |                                   | NC_015451            | NC_015450     | NC_015452 |
| Punta Toro virus W                           |                                   | EU725771             | EU725772      | EU725773  |
| Sandfly fever Naples virus Toscana ISS.Ph1.3 |                                   | NC_006319            | NC_006320     | NC_006318 |
| Sandfly fever Naples virus AR                |                                   | EF656363             | EF656362      | EF656361  |
| Sandfly fever Sicilian virus Izmir 19        |                                   | GQ847513             | GQ847512      | GQ847511  |
| Khasan virus LEIV-776P                       |                                   | KF892046             | KF892047      | KF892048  |
| American dog tick phlebovirus FI6            |                                   | KM048311             | Not available | KM048312  |
| Blacklegged tick phlebovirus-1 H12           |                                   | KM048313             | Not available | KM048314  |
| Blacklegged tick phlebovirus-2 H5            |                                   | KM048315             | Not available | KM048316  |
| Gouleako virus A5/Cl/2004                    |                                   | HQ541738             | HQ541737      | HQ541736  |

Table S3. Sequence identities among L segment RNAs and L proteins among phleboviruses

|                             | 1  | 2    | 3    | 4    | 5    | 6    | 7    | 8    | 9    | 10   | 11   | 12   | 13   | 14   | 15   | 16   | 17   | 18   | 19   | 20   | 21   | 22   | 23   | 24   | 25   | 26   | 27   |
|-----------------------------|----|------|------|------|------|------|------|------|------|------|------|------|------|------|------|------|------|------|------|------|------|------|------|------|------|------|------|
| SFTSV HB29                  | 1  | 95.3 | 64.1 | 61.4 | 59.4 | 41.7 | 42.5 | 43.7 | 42.8 | 42.9 | 44.1 | 44.2 | 44.1 | 44.6 | 44.5 | 44.6 | 44.2 | 44.4 | 44.8 | 44.3 | 44.3 | 42   | 41.6 | 42.3 | 42.2 | 41.3 | 35.1 |
| SFTSV YG1                   | 2  | 99.3 | 64.1 | 61   | 59.3 | 41.7 | 42.5 | 43.8 | 42.8 | 42.9 | 43.9 | 44   | 44   | 44.6 | 44.6 | 44.4 | 44   | 44.3 | 44.4 | 44.2 | 44.2 | 41.9 | 41.5 | 41.9 | 42.2 | 41.1 | 34.8 |
| Heartland virus             | 3  | 73.2 | 73.4 | 62   | 59.8 | 42.1 | 41.5 | 42.5 | 42.5 | 42.2 | 43.5 | 44   | 43.8 | 44   | 44   | 43.8 | 43.9 | 44.1 | 44.1 | 44.7 | 44.7 | 42.3 | 41.6 | 41.9 | 41.4 | 40.8 | 35.1 |
| Malsoor virus               | 4  | 68.6 | 68.8 | 70.7 | 59.4 | 42.6 | 42.6 | 43.5 | 43.5 | 43.3 | 44.2 | 44.3 | 44.2 | 43.7 | 43.8 | 44.7 | 44.3 | 44.4 | 43.5 | 44.4 | 44.4 | 41.2 | 41.6 | 42   | 41.6 | 40.8 | 34.9 |
| Hunter Island virus         | 5  | 65.1 | 65.3 | 66.4 | 66.2 | 43   | 43.7 | 43.9 | 43.5 | 43.6 | 44.5 | 44.7 | 44.6 | 44.8 | 44.9 | 44.6 | 44.3 | 44.7 | 44.5 | 45.3 | 45.3 | 43.1 | 41.3 | 42   | 41.6 | 41.3 | 35.3 |
| Kisamyo virus               | 6  | 33.5 | 33.6 | 33.7 | 34.9 | 34.9 | 63.7 | 65.6 | 66.5 | 65.9 | 42.2 | 41.5 | 41.6 | 41.2 | 41.2 | 41.9 | 41.8 | 41.7 | 41.7 | 42.9 | 43   | 39.6 | 38.8 | 39.2 | 40.1 | 41.2 | 36.6 |
| Lone Star virus             | 7  | 32.8 | 32.9 | 32.9 | 34.6 | 34.4 | 70.6 | 64.1 | 63.5 | 63.4 | 40.7 | 41   | 41   | 41.5 | 41.6 | 41.8 | 41.7 | 42.2 | 41.5 | 42   | 42   | 39.2 | 39   | 39.8 | 39.6 | 40.2 | 35.8 |
| Bhanja virus IG690          | 8  | 34.5 | 34.5 | 34.2 | 35.6 | 35   | 72.9 | 69.5 | 81.3 | 79.4 | 42.6 | 42.8 | 43   | 42.5 | 42.5 | 42.9 | 43.3 | 43.3 | 42.8 | 42.6 | 42.7 | 39.8 | 39.9 | 40.6 | 41.6 | 40.5 | 36.1 |
| Bhanja virus R-1819         | 9  | 34.2 | 34.3 | 33.8 | 35.4 | 34.7 | 73.2 | 69.3 | 95.2 | 80.8 | 42.7 | 42.8 | 42.8 | 42.5 | 42.4 | 42.9 | 42.7 | 42.7 | 43   | 42.8 | 42.8 | 39.7 | 40   | 41   | 41.3 | 40.7 | 36.4 |
| Bhanja virus IbAr2709       | 10 | 33.9 | 34   | 33.5 | 35.1 | 34.5 | 72.7 | 68.7 | 92.9 | 94.2 | 42.4 | 42.7 | 42.7 | 42.6 | 42.3 | 43.2 | 42.7 | 42.7 | 42.1 | 42.5 | 42.5 | 39.6 | 39.8 | 40.5 | 41.2 | 41.4 | 36.2 |
| Grand Arbaud virus          | 11 | 33.2 | 33.2 | 33.4 | 34.6 | 33.9 | 30   | 29.3 | 29.6 | 29.5 | 29.5 | 70.7 | 70.7 | 70.8 | 70.7 | 70.5 | 70.7 | 70.9 | 70.2 | 70.4 | 70.5 | 58.5 | 52   | 52.5 | 44.1 | 45.5 | 38.6 |
| EgAN 1825-61 virus          | 12 | 33.3 | 33.4 | 33.2 | 34.7 | 34.5 | 29.3 | 29.5 | 29.6 | 29.9 | 29.2 | 78.9 | 96.9 | 75.4 | 75.5 | 74.8 | 74.6 | 75   | 71.2 | 72.5 | 72.5 | 58.1 | 52.7 | 53   | 45.2 | 45.9 | 38.6 |
| Chize virus                 | 13 | 33.3 | 33.4 | 33.2 | 34.8 | 34.5 | 29.4 | 29.5 | 29.5 | 29.9 | 29.2 | 78.8 | 99.8 | 75.4 | 75.4 | 74.6 | 74.3 | 74.7 | 70.9 | 72.2 | 72.2 | 58.2 | 52.8 | 53.3 | 45.3 | 45.9 | 38.6 |
| Uukuniemi virus S23         | 14 | 32.9 | 33.1 | 33.5 | 34.8 | 34.2 | 30.1 | 30   | 29.7 | 29.8 | 29.8 | 80.1 | 85.6 | 85.6 | 98.8 | 77.9 | 76.8 | 77   | 70.9 | 71.1 | 71.1 | 58.5 | 52.5 | 52.8 | 45.7 | 46.2 | 39.1 |
| Uukuniemi virus Potepli63   | 15 | 33.1 | 33.3 | 33.5 | 34.8 | 34.2 | 30.1 | 30   | 29.8 | 29.9 | 29.9 | 80.1 | 85.8 | 85.7 | 99.8 | 78   | 76.9 | 77.1 | 70.9 | 71.2 | 71.2 | 58.6 | 52.6 | 52.9 | 45.7 | 46.1 | 39.2 |
| Zaliv Terpenia virus        | 16 | 33.1 | 33.3 | 33.9 | 35   | 34.3 | 29.9 | 30.2 | 30.2 | 30.3 | 30.3 | 80.1 | 85.6 | 85.5 | 91.4 | 91.6 | 79.7 | 80.1 | 71   | 71.7 | 71.7 | 58.8 | 52.6 | 53.6 | 45.3 | 45.8 | 39.1 |
| FinV707 virus               | 17 | 32.8 | 32.9 | 33.2 | 34.7 | 33.9 | 29.8 | 30.2 | 30   | 30.2 | 30.2 | 79.5 | 84.9 | 84.9 | 89.9 | 90.1 | 95.2 | 96   | 71   | 71.5 | 71.6 | 59.7 | 52.5 | 53.5 | 45.6 | 46.2 | 39.3 |
| Uukuniemi virus SCOT FT 254 | 18 | 33   | 33.1 | 33.4 | 34.9 | 34   | 30   | 30.2 | 30.1 | 30.2 | 30.2 | 79.9 | 85.2 | 85.2 | 90   | 90.2 | 95.1 | 99.2 | 71.3 | 71.6 | 71.7 | 59.1 | 52.7 | 53.7 | 45.9 | 46.4 | 39.1 |
| Precarious Point virus      | 19 | 33.6 | 33.7 | 33.9 | 35   | 34.1 | 30.1 | 30   | 30.1 | 30.3 | 29.9 | 77.2 | 77.6 | 77.6 | 78.1 | 78.1 | 78.9 | 78.3 | 78.5 | 72.4 | 72.4 | 58.4 | 52.4 | 53.4 | 44.4 | 45.8 | 38.7 |
| Murre virus                 | 20 | 33.5 | 33.6 | 34.2 | 35.2 | 34.6 | 30.2 | 29.7 | 30   | 30.3 | 30.3 | 77.8 | 80.2 | 80.2 | 80.2 | 80.4 | 81.1 | 80   | 80.2 | 80.7 | 100  | 59.6 | 52.2 | 53.3 | 45.3 | 46   | 39.8 |
| RML-105355 virus            | 21 | 33.5 | 33.6 | 34.2 | 35.2 | 34.6 | 30.2 | 29.7 | 30   | 30.3 | 30.3 | 77.8 | 80.2 | 80.2 | 80.3 | 80.5 | 81.1 | 80   | 80.2 | 80.8 | 100  | 59.6 | 52.3 | 53.3 | 45.3 | 46   | 39.8 |
| Manawa virus                | 22 | 32.6 | 32.5 | 33.4 | 33.3 | 33.5 | 28.7 | 28.2 | 29.2 | 29.2 | 29   | 59.3 | 59.7 | 59.7 | 59.3 | 59.3 | 59.9 | 60.7 | 60.6 | 60.6 | 61.1 | 61.1 | 49.5 | 49.5 | 43.4 | 43.9 | 37.2 |
| Silverwater virus           | 23 | 32.7 | 32.8 | 32.5 | 33.1 | 32.5 | 28.1 | 28.6 | 28.8 | 28.9 | 28.8 | 47.6 | 47.9 | 47.8 | 47.3 | 47.3 | 48   | 47.7 | 47.7 | 48.1 | 48.6 | 48.7 | 46.7 | 68.2 | 41.9 | 42.4 | 36.8 |
| Khsan virus                 | 24 | 32.2 | 32.2 | 32   | 33.1 | 32.6 | 28.6 | 29.3 | 28.9 | 29.2 | 28.9 | 47.7 | 47.9 | 47.8 | 47.9 | 47.9 | 48.2 | 48.2 | 48.2 | 48   | 48.8 | 48.8 | 47.4 | 79.2 | 43.2 | 42.9 | 36.6 |
| Sandfly fever Naples virus  | 25 | 31.2 | 31.2 | 31.4 | 31.7 | 30.9 | 29.1 | 27.7 | 29.2 | 29.3 | 29.4 | 34.7 | 36   | 36   | 35.6 | 35.7 | 36   | 35.6 | 35.1 | 35.6 | 35.6 | 33.8 | 33.6 | 34.2 | 52.2 | 35.6 |      |
| Rift Valley fever virus     | 26 | 32.5 | 32.4 | 31   | 32.1 | 32.2 | 30   | 28.6 | 29.4 | 29.5 | 29.4 | 35.7 | 37.1 | 37.1 | 37.4 | 37.4 | 37.1 | 37.2 | 37.4 | 36.1 | 36.8 | 36.8 | 35.7 | 34.3 | 33.9 | 51.5 | 35.9 |
| Gouleako virus              | 27 | 23.1 | 23.1 | 22.8 | 22.6 | 23.1 | 21.4 | 21.7 | 21.2 | 21.2 | 21   | 24.1 | 24.7 | 24.6 | 24.6 | 24.5 | 24.7 | 24.3 | 24.3 | 24.4 | 24.2 | 24.2 | 24.1 | 23.3 | 23.7 | 22.5 | 22.9 |

Nucleotide and amino acid sequence identities are shown in percent above and below the diagonal, respectively.

Table S4. Sequence identities among M segment RNAs and glycoproteins among phleboviruses

|                             | 1  | 2    | 3    | 4    | 5    | 6    | 7    | 8    | 9    | 10   | 11   | 12   | 13   | 14   | 15   | 16   | 17   | 18   | 19   | 20   | 21   | 22   | 23   | 24   | 25   | 26   | 27   |
|-----------------------------|----|------|------|------|------|------|------|------|------|------|------|------|------|------|------|------|------|------|------|------|------|------|------|------|------|------|------|
| SFTSV HB29                  | 1  | 92.2 | 56.4 | 53.7 | 50.1 | 34.6 | 34.4 | 35   | 35.4 | 35.9 | 31.5 | 33   | 32.8 | 32.4 | 33   | 32.6 | 32.3 | 32.4 | 32.4 | 32.1 | 32.1 | 29.8 | 31   | 31.2 | 26.8 | 29.4 | 28.9 |
| SFTSV YG1                   | 2  | 97.3 | 56.1 | 53.5 | 50.7 | 34.4 | 34   | 35.3 | 35.6 | 36   | 31.6 | 33.2 | 33   | 32.5 | 32.9 | 32.6 | 32.5 | 32.4 | 32   | 31.7 | 31.7 | 29.7 | 30.7 | 31   | 26.7 | 28.9 | 28.4 |
| Heartland virus             | 3  | 62.2 | 62.1 | 52.9 | 49.3 | 34.5 | 33.1 | 33.7 | 34.9 | 34.1 | 32   | 32.8 | 32.5 | 32.5 | 32.9 | 34   | 33.1 | 32.8 | 32.1 | 32.2 | 32.2 | 29.5 | 31.8 | 30.6 | 24.9 | 28.9 | 28.5 |
| Malsoor virus               | 4  | 56.5 | 56.6 | 56.4 | 50   | 32.8 | 33.2 | 32.1 | 33.9 | 32.6 | 31.3 | 32.1 | 32   | 31.1 | 31.6 | 32.4 | 32   | 32.3 | 31.6 | 31.5 | 31.4 | 29.4 | 30.9 | 31   | 24.8 | 27.6 | 27.9 |
| Hunter Island virus         | 5  | 52.9 | 53   | 52.6 | 49.3 | 35.4 | 33.5 | 35.2 | 35.5 | 35   | 32.4 | 32.6 | 32.5 | 31.5 | 31.5 | 33.1 | 32.8 | 32.6 | 31.5 | 31.9 | 31.9 | 30.1 | 30.3 | 31.3 | 25.3 | 28.3 | 28.6 |
| Kisamyo virus               | 6  | 23.2 | 23.5 | 23   | 23.1 | 22.1 | 46.1 | 48   | 48.2 | 47.2 | 32.5 | 33.3 | 33.2 | 31.9 | 32.1 | 32.2 | 33.4 | 33.3 | 30.9 | 32.7 | 32.7 | 29.6 | 31.4 | 31.6 | 26   | 27.7 | 28.5 |
| Lone Star virus             | 7  | 22.6 | 22.9 | 23.7 | 22.2 | 23.2 | 49.8 | 48.1 | 49.5 | 49.4 | 32.3 | 32.9 | 33.3 | 32.7 | 33.1 | 32.9 | 32.7 | 33.2 | 31.7 | 33.2 | 33.2 | 29.7 | 32.2 | 31.8 | 25.7 | 27.4 | 28.2 |
| Bhanja virus IG690          | 8  | 24.4 | 24.4 | 23.6 | 22.8 | 23.9 | 52.5 | 49.2 | 76.1 | 73   | 31.4 | 32.7 | 32.7 | 32.8 | 32.7 | 33.6 | 34.1 | 33.9 | 31.7 | 32.1 | 32.1 | 28.8 | 30.5 | 30.8 | 27   | 29.3 | 28.7 |
| Bhanja virus R-1819         | 9  | 24.3 | 24.4 | 24.4 | 23.7 | 24.1 | 52.7 | 49.6 | 88.9 | 74   | 31.9 | 33.7 | 33.9 | 33.6 | 33.7 | 34.3 | 34   | 34.1 | 32.2 | 32.7 | 32.7 | 29.5 | 31.4 | 31.8 | 27.5 | 29.9 | 28.9 |
| Bhanja virus IbAr2709       | 10 | 23.6 | 23.7 | 23.8 | 22.9 | 23.9 | 51.4 | 49.9 | 84.5 | 83.7 | 31.5 | 32.7 | 32.7 | 33.4 | 33.3 | 33.8 | 33.8 | 33.7 | 32.3 | 32.2 | 32.2 | 29.1 | 30.9 | 31.7 | 26.9 | 29   | 28.9 |
| Grand Arbaud virus          | 11 | 18.3 | 18.1 | 18.4 | 17.7 | 19.3 | 16   | 17.4 | 17.6 | 17.2 | 16.8 | 59.8 | 59.9 | 60.7 | 60.3 | 60.7 | 60.7 | 61.5 | 58.6 | 60.6 | 60.6 | 48.7 | 44.4 | 45   | 28.5 | 31.6 | 33.8 |
| EgAN 1825-61 virus          | 12 | 18.5 | 18.5 | 17.3 | 18.8 | 19.3 | 17.8 | 18.2 | 19.2 | 19   | 18.8 | 59   | 97.2 | 67.9 | 68   | 66.9 | 67.9 | 68.4 | 59.9 | 63   | 62.9 | 47.5 | 45.1 | 46.2 | 28.5 | 32   | 33.7 |
| Chize virus                 | 13 | 18.7 | 18.6 | 17.3 | 18.7 | 19.5 | 17.6 | 18.2 | 19.1 | 18.6 | 18.7 | 59.4 | 99.2 | 68   | 68.2 | 67.2 | 67.9 | 68.5 | 60.1 | 62.9 | 62.8 | 47.7 | 45.1 | 45.9 | 28.5 | 32   | 33.7 |
| Uukuniemi virus S23         | 14 | 19.7 | 19.7 | 18   | 18.9 | 19.7 | 17.6 | 17.6 | 19   | 18.3 | 18.9 | 60   | 76.2 | 76.7 | 94.5 | 72.7 | 71.7 | 71.7 | 60.4 | 61.7 | 61.6 | 48.2 | 46.3 | 45.6 | 29.3 | 31.7 | 35   |
| Uukuniemi virus Potepli63   | 15 | 19.5 | 19.5 | 17.8 | 18.6 | 19.4 | 17.8 | 17.7 | 19.2 | 18.4 | 19   | 60.3 | 76.2 | 76.7 | 98.5 | 72.8 | 71.5 | 71.7 | 60.6 | 61.3 | 61.2 | 48   | 46.4 | 45.4 | 29.2 | 32   | 34.6 |
| Zaliv Terpenia virus        | 16 | 19.5 | 19.5 | 17.7 | 19.1 | 19.8 | 17.3 | 17   | 18.7 | 18.2 | 18.2 | 57.9 | 73.5 | 73.9 | 81.9 | 81.9 | 75.1 | 75.4 | 58.9 | 61.6 | 61.6 | 48.8 | 44.7 | 45.3 | 28.8 | 32.2 | 33.3 |
| FinV707 virus               | 17 | 19.3 | 19.2 | 18   | 18.9 | 19.4 | 17.6 | 17   | 19   | 18.3 | 18.5 | 58.3 | 74   | 74.3 | 78.9 | 79   | 84.9 | 94.1 | 60.9 | 62.1 | 62   | 48.2 | 45.3 | 45.3 | 28.9 | 32.1 | 33.8 |
| Uukuniemi virus SCOT FT 254 | 18 | 19.2 | 19.1 | 18   | 18.8 | 19.4 | 17.5 | 17   | 19   | 18.2 | 18.5 | 58.1 | 73.8 | 74.1 | 79   | 78.9 | 85.3 | 99   | 60.9 | 62   | 62   | 48.7 | 45.9 | 45.1 | 29.1 | 31.9 | 34   |
| Precarious Point virus      | 19 | 18.3 | 18.5 | 18.7 | 18.6 | 17.7 | 16.2 | 17.2 | 17.8 | 17.6 | 18.6 | 59.1 | 62.7 | 62.8 | 61.9 | 61.7 | 59.8 | 61.4 | 61.6 | 61.7 | 61.7 | 45.9 | 44.2 | 43.2 | 27.1 | 31.7 | 32.8 |
| Murre virus                 | 20 | 18.3 | 18.4 | 18.9 | 18.2 | 19   | 16.2 | 16.8 | 18.2 | 17.8 | 18.3 | 58.8 | 61.3 | 61   | 63.1 | 62.7 | 61.6 | 62.5 | 62.3 | 64.6 | 99.8 | 49   | 45.4 | 46.1 | 28.4 | 32.1 | 34   |
| RML-105355 virus            | 21 | 18.3 | 18.4 | 18.9 | 18.3 | 18.8 | 16.2 | 16.7 | 18   | 17.8 | 18.3 | 58.8 | 61.2 | 60.9 | 63   | 62.6 | 61.7 | 62.6 | 62.4 | 64.5 | 98.8 | 48.9 | 45.4 | 46.1 | 28.3 | 32.2 | 34.1 |
| Manawa virus                | 22 | 18.3 | 18.2 | 18.9 | 18.6 | 18.2 | 15.9 | 16.1 | 17.3 | 16.8 | 16.6 | 42.7 | 44.9 | 44.8 | 44.7 | 44.7 | 45.5 | 44.3 | 44.4 | 42.8 | 45.5 | 45.3 | 41.8 | 41.8 | 24.9 | 27   | 29.7 |
| Silverwater virus           | 23 | 19.8 | 19.5 | 19.6 | 20.3 | 19.1 | 17.7 | 17.1 | 18.2 | 17.9 | 18.2 | 35.9 | 36.2 | 36   | 36   | 36.1 | 36   | 36.3 | 36.1 | 36   | 37.3 | 37.1 | 36.5 | 57.9 | 27.1 | 29.8 | 32.1 |
| Khsan virus                 | 24 | 19.7 | 19.5 | 18.6 | 18.8 | 19.9 | 16.7 | 16.2 | 17.8 | 17.9 | 17.7 | 34.4 | 36.1 | 36.3 | 35.9 | 35.8 | 36.4 | 36.1 | 35.9 | 35   | 36.8 | 36.6 | 34.8 | 63.2 | 27.6 | 29.7 | 33.1 |
| Sandfly fever Naples virus  | 25 | 14.3 | 14.5 | 14.4 | 13.9 | 15.4 | 13.3 | 13.3 | 13.6 | 13.6 | 13.2 | 15.1 | 17.6 | 17.4 | 17.5 | 17.2 | 16.4 | 17   | 16.7 | 15.9 | 16.1 | 16   | 15.3 | 16.7 | 17   | 27.6 | 22.6 |
| Rift Valley fever virus     | 26 | 17.4 | 17.2 | 16.4 | 16.3 | 16.1 | 15.5 | 15.6 | 17.3 | 16.6 | 16.3 | 18.2 | 18   | 18   | 18   | 17.9 | 17.4 | 17.6 | 17.6 | 17.3 | 17.1 | 17.2 | 17.4 | 17.8 | 17.8 | 27.7 | 25.7 |
| Gouleako virus              | 27 | 15.7 | 15.4 | 15   | 13.4 | 14.3 | 12.6 | 14.4 | 14.3 | 14.4 | 14.2 | 17   | 16.1 | 16.1 | 16.9 | 16.8 | 15.9 | 16.2 | 16.1 | 16.1 | 17   | 17   | 14.8 | 16.5 | 15.1 | 11.6 | 12.5 |

Nucleotide and amino acid sequence identities are shown in percent above and below the diagonal, respectively.

Table S5. Sequence identities among S segment RNAs and nucleoproteins among phleboviruses

|                             |    | 1           | 2           | 3           | 4           | 5    | 6           | 7    | 8           | 9           | 10          | 11   | 12          | 13          | 14   | 15   | 16   | 17   | 18   | 19   | 20   | 22   | 23          | 24   | 25   | 26   | 27   | 28   |
|-----------------------------|----|-------------|-------------|-------------|-------------|------|-------------|------|-------------|-------------|-------------|------|-------------|-------------|------|------|------|------|------|------|------|------|-------------|------|------|------|------|------|
| SFTSV HB29                  | 1  |             | <b>95.5</b> | 64.4        | 57.6        | 59.8 | 50.6        | 51.9 | 52.7        | 51.8        | 51.1        | 41.6 | 39.6        | 40.6        | 41.4 | 41.6 | 41.5 | 40.3 | 40.4 | 44.5 | 42.7 | 42.4 | 39.9        | 39.9 | 40.2 | 42.1 | 48.3 | 33.7 |
| SFTSV YG1                   | 2  | <b>99.6</b> |             | 64.6        | 58.1        | 59.5 | 50.2        | 52.4 | 52.1        | 51.8        | 51.3        | 41.2 | 39.5        | 40.4        | 41.5 | 41.5 | 41.4 | 40.5 | 40.6 | 44.4 | 42.8 | 42.6 | 41          | 39.7 | 39.9 | 42.2 | 48.4 | 34   |
| Heartland virus             | 3  | 61.6        | <b>61.6</b> |             | 58.7        | 61.5 | 46.5        | 48.2 | 50.1        | 48.6        | 49.4        | 42.1 | 41.6        | 42.4        | 41.3 | 41.4 | 41.4 | 41.8 | 41.8 | 45.2 | 41.6 | 41.6 | 40.1        | 41.7 | 43.8 | 42   | 47.5 | 32.7 |
| Malsoor virus               | 4  | 55.6        | <b>55.6</b> | <b>56</b>   |             | 56.2 | 48.8        | 50.1 | 48.4        | 49.4        | 48          | 38.8 | 38.8        | 39.1        | 39.2 | 39.3 | 41.8 | 40.6 | 40.4 | 42.5 | 39.7 | 39.7 | 41.2        | 41.3 | 42   | 43.7 | 44.5 | 35.1 |
| Hunter Island virus         | 5  | 60.9        | <b>60.9</b> | <b>58.9</b> | <b>54.2</b> |      | 47.3        | 47.1 | 49.9        | 48.8        | 48.9        | 42.4 | 40          | 40.2        | 39.7 | 39.7 | 39.6 | 40.7 | 40.7 | 42.2 | 41.2 | 41.1 | 42.3        | 41.8 | 43.5 | 46.7 | 46.1 | 32.1 |
| Kisamyo virus               | 6  | 41.1        | 41.1        | 38.7        | 37.6        | 37.6 |             | 61.3 | 67.4        | 68.4        | <b>67.4</b> | 41   | 39.1        | 39.1        | 40   | 40   | 41   | 41   | 40.9 | 42.2 | 41.8 | 41.8 | 41.3        | 40.3 | 45.1 | 42   | 45.7 | 35.2 |
| Lone Star virus             | 7  | 42.9        | 42.9        | 40.5        | 40.7        | 38.4 | <b>57.7</b> |      | 62.9        | <b>64.3</b> | <b>63.3</b> | 39.1 | 40.6        | 40.5        | 41.8 | 41.9 | 39.3 | 40.6 | 40.7 | 42.6 | 40.4 | 40.5 | 40.7        | 43.5 | 43   | 42.3 | 44.9 | 35.1 |
| Bhanja virus IG690          | 8  | 41.3        | 41.3        | 36.4        | 37.6        | 40.8 | 68.2        | 57.1 |             | <b>85.6</b> | <b>84.8</b> | 41.7 | 39          | 39.5        | 40.7 | 41.1 | 40.4 | 39.6 | 39.7 | 42.8 | 42.8 | 42.9 | 41.6        | 42.7 | 46.3 | 42   | 46.6 | 36.1 |
| Bhanja virus R-1819         | 9  | 41.7        | 41.7        | 35.6        | 36.8        | 40   | 67.7        | 57.1 | <b>96.4</b> |             | <b>85.9</b> | 41.7 | 41.4        | 41.1        | 42.2 | 42.1 | 40.6 | 40.4 | 40.5 | 44.1 | 42.8 | 42.9 | 42.2        | 42   | 45.3 | 41.5 | 46.2 | 36.8 |
| Bhanja virus IbAr2709       | 10 | 40.9        | 40.9        | 36.8        | 37.2        | 40.4 | 68.2        | 57.1 | <b>95.1</b> | <b>96.4</b> |             | 40.3 | 40.1        | 39.6        | 40   | 39.8 | 40.2 | 39.6 | 39.6 | 43.5 | 41   | 41.1 | 43.3        | 42.1 | 45.2 | 42.4 | 46.1 | 35.5 |
| Grand Arbaud virus          | 11 | 27.5        | 27.8        | 27.8        | 24.9        | 29.7 | 25.8        | 23.8 | 26.6        | 25.4        | 25.8        |      | <b>68.5</b> | <b>69.1</b> | 67.7 | 68   | 68.4 | 68   | 68.1 | 61.8 | 59.4 | 59.4 | <b>48.5</b> | 45.2 | 44.6 | 41.2 | 43   | 34.4 |
| EgAN 1825-61 virus          | 12 | 27.8        | 28.2        | 26.7        | 26.1        | 28.5 | 24.6        | 23.4 | 27.3        | 26.2        | 26.6        | 74   |             | 98.2        | 75.4 | 75.8 | 76.6 | 74.8 | 75.3 | 63.7 | 62.8 | 62.8 | 51.3        | 46.4 | 46.7 | 42.7 | 45.7 | 36.2 |
| Chize virus                 | 13 | 27.8        | 28.2        | 26.7        | 26.1        | 28.5 | 24.6        | 23.4 | 27.3        | 26.2        | 26.6        | 74   | 100         |             | 76.6 | 76.7 | 76.7 | 75.6 | 76.1 | 63.4 | 63.4 | 63.4 | 51.2        | 47.1 | 46.5 | 43   | 45.8 | 35.8 |
| Uukuniemi virus S23         | 14 | 27.1        | 27.5        | 25.5        | 22.6        | 27   | 24.6        | 23.8 | 25.4        | 25.4        | 25          | 72.1 | 83.5        | 83.5        |      | 97.5 | 80.5 | 81.2 | 81.6 | 66   | 66.2 | 66.2 | 51.2        | 47.6 | 46.5 | 41.3 | 45.4 | 36.1 |
| Uukuniemi virus Potepli63   | 15 | 27          | 27.3        | 25.8        | 23          | 26.9 | 24.9        | 24.1 | 24.9        | 24.9        | 24.5        | 71.4 | 83.1        | 83.1        | 98.8 |      | 80.9 | 81.5 | 81.9 | 65.2 | 65.8 | 65.8 | 50.5        | 47.6 | 46.9 | 41.8 | 44.4 | 36.7 |
| Zaliv Terpenia virus        | 16 | 26.3        | 26.7        | 27.5        | 24.1        | 26.2 | 24.6        | 25   | 24.6        | 24.6        | 25          | 72.4 | 81.9        | 81.9        | 86.2 | 85.9 |      | 86.7 | 86.9 | 65.1 | 63.4 | 63.4 | 51.2        | 44.2 | 45.4 | 40.9 | 45.7 | 36   |
| FinV707 virus               | 17 | 27.1        | 27.5        | 27.5        | 24.5        | 27   | 24.2        | 25.4 | 24.6        | 24.6        | 24.2        | 71.3 | 79.1        | 79.1        | 87   | 87.5 | 92.9 |      | 99.2 | 63.8 | 64.2 | 64.1 | 51.2        | 46   | 46.1 | 41.4 | 46.3 | 36   |
| Uukuniemi virus SCOT FT 254 | 18 | 27.1        | 27.5        | 27.5        | 24.5        | 27   | 24.2        | 25.4 | 24.6        | 24.6        | 24.2        | 71.3 | 79.1        | 79.1        | 87   | 87.5 | 92.9 | 100  |      | 64.3 | 64.2 | 64.1 | 51          | 45.9 | 46.2 | 41.6 | 46.3 | 36.2 |
| Precarious Point virus      | 19 | 28.5        | 28.1        | 30          | 27.6        | 27.8 | 28.7        | 24.8 | 29.5        | 29.1        | 29.9        | 61.4 | 65.8        | 65.8        | 66.5 | 66.3 | 65   | 65   | 65   |      | 67.8 | 67.7 | 51.6        | 47.5 | 47.6 | 41.7 | 47.3 | 37.4 |
| Murre virus                 | 20 | 29.7        | 29.3        | 27.3        | 25.2        | 29.2 | 26.1        | 24.5 | 28.8        | 29.2        | 28.4        | 58.8 | 62          | 62          | 62.8 | 61.7 | 59.6 | 60.8 | 60.8 | 71.8 |      | 99.6 | 48.4        | 46.5 | 46.4 | 42.9 | 44.8 | 38.6 |
| RML-105355 virus            | 22 | 29.3        | 28.9        | 27          | 25.2        | 28.8 | 26.1        | 24.5 | 28.8        | 29.2        | 28.4        | 58.4 | 61.6        | 61.6        | 62.8 | 61.7 | 59.2 | 60.4 | 60.4 | 71   | 98.8 |      | 48.5        | 46.5 | 46.4 | 42.8 | 44.5 | 38.7 |
| Manawa virus                | 23 | 27.8        | 27.5        | 27.5        | 26.5        | 30.5 | 27.7        | 26.2 | 25.4        | 25.8        | 26.2        | 41.3 | 41.7        | 41.7        | 41.3 | 42   | 40.6 | 41.3 | 41.3 | 44.1 | 39.2 | 38.8 |             | 45   | 47.1 | 46.1 | 44.1 | 34.1 |
| Silverwater virus           | 24 | 28.6        | 28.2        | 27.4        | 26.7        | 29.2 | 23.9        | 25   | 25.4        | 25.8        | 25.8        | 34.1 | 34.5        | 34.5        | 33.3 | 33.3 | 32.2 | 32.2 | 32.2 | 36   | 34.9 | 35.3 | 36.8        |      | 60.5 | 47.1 | 46.5 | 39   |
| Khsan virus                 | 25 | 27.7        | 27.7        | 30.4        | 28.2        | 30.3 | 27.6        | 27.6 | 27.2        | 27.2        | 27.6        | 34.5 | 35.3        | 35.3        | 33.3 | 33.6 | 34.1 | 33.7 | 33.7 | 37.3 | 34.9 | 35.3 | 39.2        | 65.5 |      | 44.3 | 45.8 | 36.8 |
| Sandfly fever Naples virus  | 26 | 31.9        | 31.5        | 31.9        | 31.1        | 34.1 | 31.5        | 29.9 | 30.3        | 30.7        | 30.7        | 27.2 | 29.6        | 29.6        | 28.8 | 28.7 | 26.9 | 27.2 | 27.2 | 29.3 | 30   | 29.6 | 33.9        | 36.3 | 34.6 |      | 52.7 | 33.1 |
| Rift Valley fever virus     | 27 | 38.2        | 37.8        | 35.8        | 35.5        | 36.1 | 34.3        | 32   | 33.2        | 32.8        | 34.4        | 35.4 | 35.8        | 35.8        | 35.4 | 34.9 | 35.8 | 36.2 | 36.2 | 36.1 | 35.3 | 34.9 | 35          | 33.7 | 34.1 | 48.2 |      | 33.9 |
| Gouleako virus              | 28 | 17.8        | 17.5        | 18.2        | 21.6        | 18.6 | 20.7        | 19.3 | 20          | 20          | 20.4        | 19   | 17.5        | 17.5        | 19.7 | 19.3 | 18.2 | 18.6 | 18.6 | 20.1 | 19.3 | 19.3 | 19.7        | 22.7 | 21.2 | 15.9 | 21.2 |      |

Nucleotide and amino acid sequence identities are shown in percent above and below the diagonal, respectively.

Viruses with more than 90% identities in amino acid sequence are indicated by bold boxes.

Table S6. Sequence identities among S segment RNAs and nonstructural proteins among phleboviruses

|                             | 1  | 2    | 3    | 4    | 5    | 6    | 7    | 8    | 9    | 10   | 11   | 12   | 13   | 14   | 15   | 16   | 17   | 18   | 19   | 20   | 21   | 22   | 23   | 24   | 25   | 26   |
|-----------------------------|----|------|------|------|------|------|------|------|------|------|------|------|------|------|------|------|------|------|------|------|------|------|------|------|------|------|
| SFTSV HB29                  | 1  | 95.1 | 54.5 | 34.1 | 33.2 | 27.4 | 28.1 | 25.8 | 23.9 | 25.6 | 30.8 | 34.6 | 34.7 | 35   | 35   | 34.7 | 35   | 34.5 | 29.1 | 31.3 | 31.3 | 25.3 | 29.5 | 28.5 | 28.4 | 25.6 |
| SFTSV YG1                   | 2  | 97.6 | 54.7 | 34.6 | 34.3 | 28.2 | 28.2 | 26   | 24   | 25.1 | 30.9 | 34.3 | 34.5 | 35   | 35   | 34.7 | 34.8 | 34.3 | 30.1 | 31.5 | 31.5 | 25.7 | 29.6 | 29.3 | 28.7 | 25.8 |
| Heartland virus             | 3  | 58.8 | 58.8 | 33.6 | 30.2 | 26.7 | 25.9 | 23.1 | 26.3 | 24.2 | 29.5 | 31.8 | 31.8 | 32.4 | 32.8 | 34.1 | 31.8 | 31.9 | 28   | 28.7 | 28.7 | 25.7 | 26.9 | 25.9 | 25.8 | 22.8 |
| Malsoor virus               | 4  | 37.4 | 37   | 34.7 | 24.2 | 22.3 | 24.9 | 21.3 | 21.4 | 21.9 | 26.5 | 31.7 | 31.7 | 30.5 | 30.8 | 30.8 | 30.7 | 30.8 | 26.5 | 26.7 | 26.7 | 26.7 | 22.4 | 20.8 | 23.6 | 21.1 |
| Hunter Island virus         | 5  | 29   | 28.7 | 26.1 | 25.2 | 23.7 | 21.8 | 22.3 | 21.7 | 20.9 | 26.7 | 29.3 | 29.4 | 29.6 | 29.1 | 28.6 | 30   | 30   | 27.7 | 28.3 | 28.3 | 24.6 | 27.4 | 25.7 | 21.5 | 23.3 |
| Kisamyo virus               | 6  | 12.3 | 12.3 | 12.7 | 15.7 | 10.9 | 33.3 | 34.2 | 34.3 | 33.8 | 27.7 | 28.4 | 27.6 | 29.3 | 28.9 | 27   | 26.1 | 26.8 | 23.8 | 26   | 26   | 24.5 | 23.6 | 24.6 | 20.6 | 23.9 |
| Lone Star virus             | 7  | 15.9 | 15.9 | 15.1 | 17.9 | 12.4 | 49.2 | 33.3 | 34.6 | 33   | 27.2 | 28.9 | 29.2 | 29.2 | 29.7 | 28.4 | 29.8 | 30.1 | 25.8 | 27.6 | 27.6 | 22.7 | 22.1 | 23.2 | 20.6 | 20.6 |
| Bhanja virus IG690          | 8  | 15.5 | 15.8 | 17.4 | 14   | 11.2 | 45.9 | 39   | 69.2 | 68.3 | 24.7 | 27.4 | 27.7 | 28.5 | 28.7 | 28   | 28.8 | 28.6 | 26.3 | 26   | 26   | 23.8 | 24.5 | 26.5 | 22.1 | 23.4 |
| Bhanja virus R-1819         | 9  | 15.3 | 15.5 | 16.5 | 14.9 | 10.9 | 44.9 | 39.9 | 86.6 | 71.6 | 25.3 | 27.3 | 27.3 | 26.9 | 27.5 | 27   | 26.8 | 27.1 | 24.7 | 25.3 | 25.3 | 23   | 24.3 | 25.9 | 20.2 | 20.9 |
| Bhanja virus IbAr2709       | 10 | 14.1 | 14.4 | 15.9 | 13.4 | 10.9 | 45.2 | 38.4 | 84.4 | 87.5 | 25.1 | 28.5 | 29.2 | 27.9 | 27.9 | 27.9 | 28.2 | 28.3 | 24   | 26.5 | 26.5 | 23   | 23.5 | 24.3 | 22.8 | 20.7 |
| Grand Arbaud virus          | 11 | 14   | 14   | 13.1 | 10.5 | 10.8 | 12.2 | 11.9 | 11.3 | 10.4 | 10.7 | 49.8 | 49.4 | 53.5 | 53.4 | 53   | 53.5 | 53.5 | 41.9 | 43.8 | 43.8 | 32.4 | 29.5 | 29.8 | 26   | 23.8 |
| EgAN 1825-61 virus          | 12 | 14.3 | 14.3 | 15   | 10.5 | 13.8 | 10.7 | 9.45 | 11.6 | 11.6 | 9.76 | 44.7 | 96.1 | 60.9 | 60.6 | 57.7 | 57.4 | 58.5 | 44.7 | 42.2 | 42.2 | 35.8 | 32.7 | 30.5 | 27.8 | 27.2 |
| Chize virus                 | 13 | 14.3 | 14.3 | 15   | 10.5 | 13.8 | 11   | 9.45 | 11.3 | 11.9 | 9.76 | 44   | 97.1 | 61   | 60.9 | 57.3 | 57.9 | 58.6 | 44.6 | 42.2 | 42.2 | 35.1 | 33.3 | 31.5 | 28.1 | 27.8 |
| Uukuniemi virus S23         | 14 | 14.9 | 14.9 | 15.6 | 12   | 10.1 | 13.1 | 9.45 | 14   | 11.9 | 11.3 | 46.9 | 53.1 | 52.4 | 96.7 | 65.6 | 64.4 | 64.7 | 46.1 | 46.7 | 46.7 | 33.1 | 32.8 | 32.3 | 27.8 | 27   |
| Uukuniemi virus Potepli63   | 15 | 14.9 | 14.9 | 15.6 | 12   | 10.1 | 13.1 | 9.76 | 13.7 | 11.6 | 11   | 47.6 | 53.5 | 52.8 | 97.8 | 66.4 | 65.2 | 65.6 | 45.8 | 46.3 | 46.3 | 33.3 | 32.8 | 32.2 | 27.6 | 26.9 |
| Zaliv Terpenia virus        | 16 | 13.3 | 13.3 | 15.3 | 11.7 | 11.8 | 11.9 | 9.76 | 12.5 | 11.3 | 10.7 | 50.6 | 51.3 | 51.3 | 63   | 64.5 | 73.6 | 73.6 | 47.3 | 44.4 | 44.4 | 34   | 31.7 | 31.4 | 27.8 | 26.2 |
| FinV707 virus               | 17 | 12.7 | 12.7 | 15   | 11.7 | 12.8 | 11.3 | 9.45 | 11   | 10.4 | 9.45 | 48.4 | 50.2 | 49.5 | 57.5 | 58.6 | 81.7 | 96.1 | 46.6 | 43.8 | 43.8 | 35.6 | 33.3 | 34   | 27.8 | 26.5 |
| Uukuniemi virus SCOT FT 254 | 18 | 12.7 | 12.7 | 15   | 12   | 12.8 | 11   | 9.15 | 11   | 10.4 | 9.45 | 48   | 50.2 | 49.5 | 57.5 | 58.6 | 81.3 | 98.2 | 47.2 | 44.6 | 44.6 | 35.7 | 33.4 | 32.9 | 28.3 | 27   |
| Precarious Point virus      | 19 | 14.6 | 14.9 | 13.1 | 10.8 | 11.7 | 9.15 | 9.76 | 10.1 | 8.84 | 7.93 | 36.7 | 35.6 | 34.9 | 36.7 | 36.4 | 39.3 | 38.6 | 38.2 | 44.1 | 44.1 | 31.7 | 29.3 | 27.1 | 23.9 | 24.2 |
| Murre virus                 | 20 | 14   | 14   | 13.1 | 12.3 | 11.5 | 8.23 | 9.45 | 9.76 | 9.15 | 8.84 | 35.5 | 33.7 | 33.7 | 34.1 | 34.4 | 31.9 | 34.4 | 34.1 | 36   | 100  | 31.9 | 30.1 | 31.6 | 27.8 | 25.6 |
| RML-105355 virus            | 21 | 14   | 14   | 13.1 | 12.3 | 11.5 | 8.23 | 9.45 | 9.76 | 9.15 | 8.84 | 35.5 | 33.7 | 33.7 | 34.1 | 34.4 | 31.9 | 34.4 | 34.1 | 36   | 100  | 31.9 | 30.1 | 31.6 | 27.8 | 25.6 |
| Manawa virus                | 22 | 10.8 | 10.8 | 11.6 | 11.5 | 11.2 | 8    | 9.23 | 9.85 | 10.8 | 10.8 | 21.3 | 20.9 | 20.9 | 19.9 | 19.5 | 20.6 | 19.9 | 20.2 | 21.7 | 20.2 | 20.2 | 25.6 | 26.1 | 25.4 | 20.7 |
| Silverwater virus           | 23 | 13.9 | 13.9 | 13.5 | 11.3 | 12.8 | 11.8 | 12.5 | 16.1 | 15.2 | 13.9 | 17.4 | 16.7 | 16.4 | 17.8 | 18.2 | 16.4 | 18.5 | 18.9 | 19.4 | 17.4 | 17.4 | 14.5 | 33.6 | 27.3 | 24.3 |
| Khsan virus                 | 24 | 13.4 | 13.4 | 13.4 | 12.4 | 11.3 | 11.9 | 10.7 | 14   | 13.4 | 12.5 | 18.9 | 18.5 | 18.5 | 18.9 | 19.2 | 19.9 | 20.3 | 20.3 | 20.2 | 20.6 | 20.6 | 16.3 | 49.5 | 23.9 | 21.5 |
| Sandfly fever Naples virus  | 25 | 11.5 | 11.3 | 10.5 | 12   | 9.24 | 13.2 | 10.2 | 12.6 | 13.2 | 13.2 | 11.6 | 11.1 | 11.1 | 10.8 | 11.1 | 12.8 | 11.3 | 11.3 | 10.8 | 10.8 | 10.8 | 10.3 | 13.6 | 10.6 | 21.1 |
| Rift Valley fever virus     | 26 | 10.8 | 11.2 | 9.73 | 8.77 | 6.88 | 9.38 | 9.41 | 11.1 | 11.1 | 10.9 | 9.62 | 9.94 | 9.94 | 9.29 | 9.62 | 10.9 | 9.94 | 9.62 | 8.6  | 7.37 | 7.37 | 9.27 | 9.27 | 12.1 | 10.3 |

Nucleotide and amino acid sequence identities are shown in percent above and below the diagonal, respectively.
